# Supplementary material for: Structural basis for matriglycan synthesis by the LARGE1 dual glycosyltransferase
Source: PubMed Central journal article supplement (PMC9746966; doi:10.1371/journal.pone.0278713), 2022-12-13

Raw image for figure 7b

|        |            |       |       |             |       |           |
|--------|------------|-------|-------|-------------|-------|-----------|
| Marker | Cell media |       | space | Cell lysate |       | Unrelated |
|        | WT         | E509K |       | WT          | E509K |           |

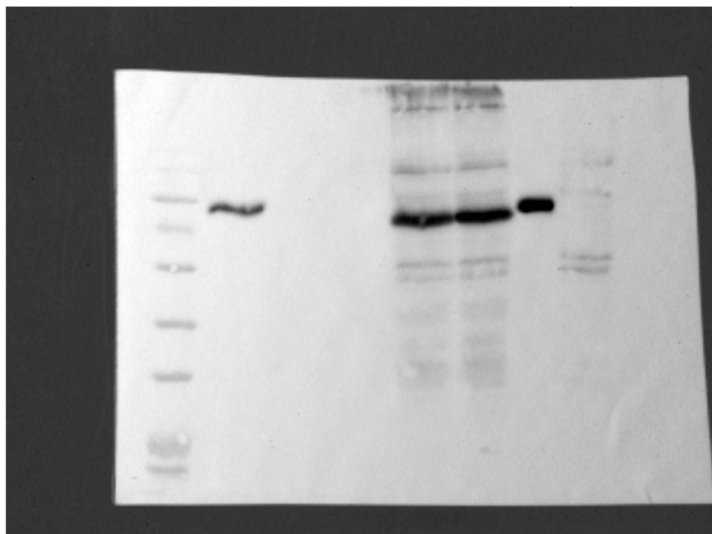

Raw image for figure 7c

|        |       |        |       |        |       |        |       |        |        |
|--------|-------|--------|-------|--------|-------|--------|-------|--------|--------|
| Marker | WT    |        | S331F |        | C443Y |        | W495R |        | NC     |
|        | Media | Lysate | Media | Lysate | Media | Lysate | Media | Lysate | Lysate |

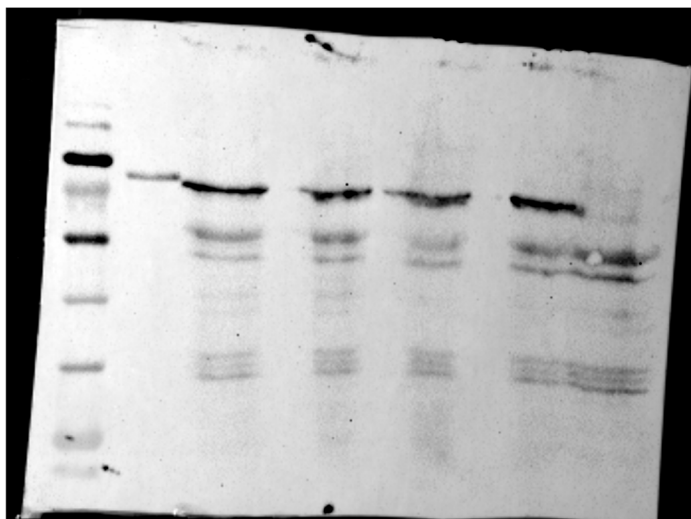

Supplement: pone.0278713.s001.pdf [file pone.0278713.s001.pdf]
